# Supplementary material for: A Deep Sequencing Approach to Uncover the miRNOME in the Human Heart
Source: PubMed Central journal article supplement (PMC3583901; doi:10.1371/journal.pone.0057800), 2013-02-27
Supplement: pone.0057800.s001.pdf [file pone.0057800.s001.pdf]

**Supplemental Table S1:** Demographic / clinical characteristics and echocardiographic indices of the 16 patients included in the study.

| Parameter                           | NF         | HCM        | DCM        |
|-------------------------------------|------------|------------|------------|
| n                                   | 4          | 5          | 7          |
| <b>Demographic/Clinical aspects</b> |            |            |            |
| Age, years                          | 56.4 ± 6.2 | 41.2 ± 5.8 | 50.6 ± 5.4 |
| Men/women                           | 2/2        | 2/3        | 5/2        |
| Arterial hypertension, n            | 1          | 1          | 1          |
| Diabetes mellitus, n                | 1          | 0          | 0          |
| <b>Medications</b>                  |            |            |            |
| β-blockers, n                       | 1          | 2          | 5          |
| ACEIs/ARBs, n                       | 0          | 3          | 5          |
| diuretics, n                        | 0          | 3          | 6          |
| statins, n                          | 1          | 1          | 2          |
| <b>Echocardiographic indices</b>    |            |            |            |
| LVEF (%)                            | nd         | 25 ± 4.3   | 18.7 ± 6.5 |
| LVEDd (mm)                          | nd         | 61.4 ± 4.6 | 78.3 ± 9.7 |

NF - non failing; HCM - hypertrophic cardiomyopathy; DCM - dilated cardiomyopathy;  
 ACEIs - angiotensin converting enzyme inhibitors; ARBs - angiotensin receptor blockers; LVEF - left ventricular ejection fraction; LVEDd - left ventricular end-diastolic diameter
