# Supplementary material for: A Deep Sequencing Approach to Uncover the miRNOME in the Human Heart
Source: PubMed Central journal article supplement (PMC3583901; doi:10.1371/journal.pone.0057800), 2013-02-27
Supplement: pone.0057800.s002.pdf [file pone.0057800.s002.pdf]

**Supplemental Table S2:** Primers sequences used for real-time PCR analysis

| Transcript | Primer Sequence                                                          |
|------------|--------------------------------------------------------------------------|
| 3615376    | h: 5'-CAGCCCGGATCCCAGCCCACTT<br>m: 5'-CAGCCCGGATCCCAGGCCTGCG             |
| 5243049    | h: 5'-CTCCTGTCATCCTGTCCAGTGTCTCCAG<br>m: 5'-CTCCTGTCATCCTGTATTCTGAGGTGAC |
| s2154      | h: 5'- AGTTGCCTTTTTGTTCCCATGC<br>m: 5'- AGTTCCTTTTTGTTCCCATG             |
| nppa       | fw: 5'-CGAGGAAGTCACCATCAAACCAC<br>rv: 5' TAGGGACAGACTGCAAGAGG            |
| nppb       | fw: 5'-AGCCTCGGAGTTGGAAACG<br>rv: 5'- CGACAGTTTGCCCTGCAAT                |
| gapdh      | fw: 5'-GAAGCTCATCTATGAGAAGGC<br>rv: 5'-AAGACGAAGGAGCTGCAGAAC             |
