# Supplementary material for: A Deep Sequencing Approach to Uncover the miRNOME in the Human Heart
Source: PubMed Central journal article supplement (PMC3583901; doi:10.1371/journal.pone.0057800), 2013-02-27
Supplement: pone.0057800.s003.pdf [file pone.0057800.s003.pdf]

**Supplemental Table S3.** Quantification (normalized sequencing reads) of microRNAs in Non-Failing (NF), Dilated Cardiomyopathy (DCM) and Hypertrophic Cardiomyopathy (HCM) human hearts. *p* values for DCM versus NF, HCM vs NF and DCM vs HCM are given. Colored columns depict *q* values (False Discover Rate - adjusted *p* values) for the different comparisons. MicroRNAs that have been previously involved in cardiac disease are marked in red. MicroRNAs that are differentially expressed between DCM and HCM (based on normal *p* values < 0.05) are depicted in purple.

| miRNA           | NF            | DCM            | HCM            | DCM vs NF | DCM vs NF | HCM vs NF | HCM vs NF | DCM vs HCM | DCM vs HCM |
|-----------------|---------------|----------------|----------------|-----------|-----------|-----------|-----------|------------|------------|
| hsa-mir-145 5p  | 19872 ± 11395 | 139631 ± 45998 | 231137 ± 20347 | 0.043     | 0.313     | 0.003     | 0.018     | 0.090      | 0.251      |
| hsa-mir-24 3p   | 7332 ± 2526   | 78297 ± 28229  | 103471 ± 14515 | 0.051     | 0.313     | 0.017     | 0.041     | 0.430      | 0.609      |
| hsa-mir-125a 5p | 4853 ± 2014   | 28845 ± 9263   | 46740 ± 10224  | 0.085     | 0.313     | 0.009     | 0.030     | 0.161      | 0.342      |
| hsa-mir-30d 5p  | 3984 ± 2814   | 16627 ± 6172   | 17867 ± 4892   | 0.135     | 0.313     | 0.126     | 0.153     | 0.870      | 0.931      |
| hsa-mir-1 3p    | 3355 ± 1035   | 27862 ± 10639  | 70378 ± 13225  | 0.137     | 0.313     | 0.001     | 0.013     | 0.011      | 0.095      |
| hsa-mir-23b 3p  | 3303 ± 1814   | 42036 ± 14006  | 31008 ± 7351   | 0.035     | 0.313     | 0.140     | 0.167     | 0.487      | 0.655      |
| hsa-mir-1974 3p | 1907 ± 1587   | 941 ± 266      | 1181 ± 371     | 0.361     | 0.460     | 0.518     | 0.532     | 0.805      | 0.878      |
| hsa-mir-99a 5p  | 1838 ± 1299   | 6786 ± 2138    | 12557 ± 1854   | 0.106     | 0.313     | 0.004     | 0.021     | 0.049      | 0.184      |
| hsa-mir-30c 5p  | 1834 ± 1506   | 8552 ± 3319    | 10290 ± 679    | 0.100     | 0.313     | 0.058     | 0.087     | 0.633      | 0.761      |
| hsa-mir-133a 3p | 1588 ± 1133   | 6950 ± 2514    | 21567 ± 9223   | 0.492     | 0.552     | 0.028     | 0.053     | 0.059      | 0.206      |
| hsa-mir-1975 3p | 1566 ± 1373   | 3638 ± 1181    | 5109 ± 532     | 0.214     | 0.348     | 0.057     | 0.087     | 0.339      | 0.532      |
| hsa-mir-1978 5p | 1563 ± 1178   | 1115 ± 237     | 1717 ± 179     | 0.563     | 0.612     | 0.852     | 0.858     | 0.409      | 0.599      |
| hsa-mir-103 3p  | 1519 ± 700    | 8741 ± 3043    | 5829 ± 1702    | 0.067     | 0.313     | 0.287     | 0.310     | 0.405      | 0.596      |
| hsa-mir-26a 5p  | 1478 ± 914    | 5371 ± 1817    | 12765 ± 1130   | 0.107     | 0.313     | 0.000     | 0.007     | 0.004      | 0.055      |
| hsa-mir-126 3p  | 1432 ± 1010   | 6448 ± 2760    | 13440 ± 2177   | 0.177     | 0.328     | 0.007     | 0.026     | 0.053      | 0.190      |
| hsa-mir-30a 5p  | 1255 ± 803    | 4300 ± 1678    | 7918 ± 1859    | 0.223     | 0.351     | 0.021     | 0.045     | 0.127      | 0.297      |
| hsa-mir-1308 5p | 1021 ± 837    | 564 ± 189      | 577 ± 121      | 0.416     | 0.493     | 0.460     | 0.477     | 0.980      | 0.997      |
| hsa-mir-30b 5p  | 1001 ± 743    | 10495 ± 5091   | 8713 ± 488     | 0.116     | 0.313     | 0.224     | 0.249     | 0.741      | 0.832      |
| hsa-mir-378 5p  | 895 ± 461     | 2417 ± 733     | 4601 ± 543     | 0.132     | 0.313     | 0.003     | 0.019     | 0.028      | 0.141      |
| hsa-let-7f 5p   | 874 ± 517     | 3896 ± 1174    | 4913 ± 321     | 0.043     | 0.313     | 0.015     | 0.038     | 0.435      | 0.611      |
| hsa-mir-29c 3p  | 756 ± 210     | 4283 ± 1784    | 9127 ± 3350    | 0.294     | 0.403     | 0.030     | 0.054     | 0.132      | 0.302      |
| hsa-mir-133b 3p | 755 ± 509     | 3694 ± 1316    | 11782 ± 5223   | 0.501     | 0.558     | 0.030     | 0.054     | 0.062      | 0.207      |

|                 |           |              |              |       |       |       |       |       |       |
|-----------------|-----------|--------------|--------------|-------|-------|-------|-------|-------|-------|
| hsa-mir-451 5p  | 753 ± 411 | 3183 ± 2231  | 10585 ± 3011 | 0.484 | 0.548 | 0.017 | 0.041 | 0.035 | 0.153 |
| hsa-mir-23a 3p  | 733 ± 264 | 18508 ± 6561 | 16694 ± 2264 | 0.032 | 0.313 | 0.066 | 0.094 | 0.798 | 0.873 |
| hsa-let-7a 5p   | 727 ± 401 | 7693 ± 2221  | 11223 ± 1883 | 0.029 | 0.313 | 0.004 | 0.023 | 0.207 | 0.409 |
| hsa-mir-378 3p  | 663 ± 373 | 1940 ± 737   | 3031 ± 423   | 0.180 | 0.328 | 0.029 | 0.053 | 0.218 | 0.416 |
| hsa-mir-191 5p  | 654 ± 310 | 5515 ± 1635  | 9638 ± 1523  | 0.041 | 0.313 | 0.002 | 0.015 | 0.061 | 0.206 |
| hsa-let-7g 5p   | 645 ± 369 | 3658 ± 1132  | 4079 ± 476   | 0.039 | 0.313 | 0.030 | 0.054 | 0.739 | 0.832 |
| hsa-mir-29b 3p  | 635 ± 387 | 2909 ± 1257  | 5595 ± 1552  | 0.238 | 0.367 | 0.025 | 0.050 | 0.141 | 0.312 |
| hsa-mir-140 3p  | 605 ± 238 | 2986 ± 911   | 5351 ± 759   | 0.062 | 0.313 | 0.002 | 0.016 | 0.049 | 0.184 |
| hsa-mir-125b 5p | 584 ± 308 | 6125 ± 1603  | 12202 ± 3497 | 0.107 | 0.313 | 0.005 | 0.024 | 0.063 | 0.207 |
| hsa-mir-342 3p  | 523 ± 301 | 2851 ± 915   | 5094 ± 1374  | 0.136 | 0.313 | 0.012 | 0.033 | 0.125 | 0.297 |
| hsa-let-7b 5p   | 505 ± 282 | 5066 ± 1251  | 6057 ± 1813  | 0.036 | 0.313 | 0.020 | 0.044 | 0.597 | 0.742 |
| hsa-mir-107 3p  | 431 ± 249 | 2342 ± 845   | 1673 ± 318   | 0.071 | 0.313 | 0.255 | 0.279 | 0.475 | 0.643 |
| hsa-mir-29a 3p  | 423 ± 209 | 2967 ± 1167  | 7156 ± 2547  | 0.295 | 0.403 | 0.018 | 0.042 | 0.076 | 0.231 |
| hsa-mir-143 3p  | 355 ± 125 | 10685 ± 4338 | 15587 ± 2036 | 0.060 | 0.313 | 0.014 | 0.036 | 0.316 | 0.505 |
| hsa-mir-30e 5p  | 332 ± 181 | 1705 ± 715   | 2486 ± 808   | 0.195 | 0.334 | 0.066 | 0.094 | 0.421 | 0.602 |
| hsa-mir-92a 3p  | 297 ± 174 | 1715 ± 502   | 2765 ± 622   | 0.076 | 0.313 | 0.008 | 0.028 | 0.150 | 0.323 |
| hsa-mir-1979 5p | 280 ± 262 | 293 ± 69     | 398 ± 46     | 0.942 | 0.945 | 0.542 | 0.555 | 0.535 | 0.700 |
| hsa-mir-223 3p  | 269 ± 133 | 3442 ± 1429  | 10491 ± 5385 | 0.483 | 0.548 | 0.048 | 0.076 | 0.109 | 0.276 |
| hsa-mir-365 3p  | 269 ± 120 | 1562 ± 405   | 4081 ± 1269  | 0.247 | 0.373 | 0.005 | 0.024 | 0.025 | 0.141 |
| hsa-mir-17 5p   | 266 ± 172 | 1086 ± 444   | 1737 ± 420   | 0.190 | 0.334 | 0.037 | 0.064 | 0.262 | 0.463 |
| hsa-mir-193b 3p | 228 ± 160 | 2582 ± 782   | 5397 ± 1556  | 0.133 | 0.313 | 0.006 | 0.025 | 0.061 | 0.206 |
| hsa-mir-1975 5p | 223 ± 190 | 322 ± 143    | 168 ± 14     | 0.620 | 0.645 | 0.795 | 0.803 | 0.412 | 0.600 |
| hsa-mir-199a 5p | 204 ± 116 | 3536 ± 1668  | 5245 ± 879   | 0.112 | 0.313 | 0.031 | 0.056 | 0.368 | 0.557 |
| hsa-mir-100 5p  | 192 ± 153 | 561 ± 63     | 1486 ± 298   | 0.169 | 0.328 | 0.000 | 0.007 | 0.002 | 0.035 |
| hsa-mir-197 3p  | 186 ± 74  | 1018 ± 242   | 2576 ± 488   | 0.093 | 0.313 | 0.000 | 0.007 | 0.003 | 0.049 |
| hsa-mir-19b 3p  | 164 ± 95  | 757 ± 279    | 3820 ± 921   | 0.453 | 0.524 | 0.001 | 0.009 | 0.001 | 0.024 |
| hsa-mir-1979 3p | 161 ± 150 | 222 ± 61     | 274 ± 39     | 0.606 | 0.638 | 0.378 | 0.400 | 0.639 | 0.765 |
| hsa-mir-423 3p  | 159 ± 102 | 662 ± 261    | 1355 ± 315   | 0.208 | 0.342 | 0.011 | 0.033 | 0.072 | 0.224 |
| hsa-mir-26b 5p  | 154 ± 84  | 940 ± 328    | 2422 ± 413   | 0.126 | 0.313 | 0.001 | 0.009 | 0.006 | 0.066 |
| hsa-mir-21 5p   | 153 ± 59  | 1454 ± 677   | 4779 ± 1654  | 0.391 | 0.479 | 0.011 | 0.033 | 0.030 | 0.141 |

|                 |           |            |             |       |       |       |       |       |       |
|-----------------|-----------|------------|-------------|-------|-------|-------|-------|-------|-------|
| hsa-mir-27b 3p  | 153 ± 58  | 1377 ± 457 | 1876 ± 403  | 0.059 | 0.313 | 0.017 | 0.041 | 0.383 | 0.570 |
| hsa-let-7d 5p   | 150 ± 83  | 487 ± 120  | 806 ± 285   | 0.215 | 0.348 | 0.034 | 0.060 | 0.211 | 0.409 |
| hsa-mir-152 3p  | 147 ± 101 | 443 ± 138  | 937 ± 102   | 0.125 | 0.313 | 0.001 | 0.013 | 0.012 | 0.095 |
| hsa-let-7c 5p   | 144 ± 89  | 1247 ± 363 | 1503 ± 349  | 0.040 | 0.313 | 0.021 | 0.045 | 0.580 | 0.730 |
| hsa-let-7e 5p   | 143 ± 82  | 1495 ± 481 | 1482 ± 325  | 0.038 | 0.313 | 0.053 | 0.082 | 0.982 | 0.997 |
| hsa-mir-139 5p  | 137 ± 72  | 771 ± 468  | 1758 ± 415  | 0.316 | 0.423 | 0.027 | 0.051 | 0.105 | 0.270 |
| hsa-mir-27a 3p  | 132 ± 51  | 2348 ± 823 | 3925 ± 1100 | 0.096 | 0.313 | 0.013 | 0.035 | 0.195 | 0.396 |
| hsa-mir-214 3p  | 123 ± 63  | 1192 ± 302 | 1468 ± 261  | 0.016 | 0.313 | 0.006 | 0.026 | 0.462 | 0.636 |
| hsa-mir-328 3p  | 120 ± 50  | 362 ± 100  | 752 ± 278   | 0.333 | 0.435 | 0.029 | 0.053 | 0.106 | 0.270 |
| hsa-mir-361 5p  | 112 ± 57  | 549 ± 139  | 2254 ± 41   | 0.017 | 0.313 | 0.000 | 0.000 | 0.000 | 0.000 |
| hsa-let-7i 5p   | 111 ± 68  | 898 ± 339  | 619 ± 117   | 0.062 | 0.313 | 0.241 | 0.264 | 0.454 | 0.629 |
| hsa-mir-199b 5p | 104 ± 60  | 1170 ± 557 | 1687 ± 301  | 0.128 | 0.313 | 0.042 | 0.070 | 0.415 | 0.600 |
| hsa-mir-218 5p  | 100 ± 50  | 397 ± 143  | 613 ± 173   | 0.175 | 0.328 | 0.037 | 0.064 | 0.285 | 0.483 |
| hsa-mir-193a 5p | 97 ± 47   | 221 ± 70   | 838 ± 141   | 0.376 | 0.468 | 0.000 | 0.006 | 0.000 | 0.016 |
| hsa-mir-361 3p  | 93 ± 75   | 207 ± 63   | 273 ± 29    | 0.208 | 0.342 | 0.071 | 0.097 | 0.420 | 0.602 |
| hsa-mir-30e 3p  | 84 ± 61   | 296 ± 96   | 903 ± 278   | 0.394 | 0.479 | 0.007 | 0.026 | 0.018 | 0.116 |
| hsa-mir-629 5p  | 81 ± 44   | 47 ± 34    | 29 ± 8      | 0.480 | 0.547 | 0.319 | 0.341 | 0.690 | 0.807 |
| hsa-mir-660 5p  | 79 ± 59   | 137 ± 61   | 254 ± 106   | 0.610 | 0.639 | 0.164 | 0.192 | 0.280 | 0.479 |
| hsa-mir-29b 5p  | 77 ± 49   | 232 ± 83   | 303 ± 43    | 0.149 | 0.319 | 0.057 | 0.087 | 0.466 | 0.637 |
| hsa-mir-185 5p  | 74 ± 42   | 328 ± 114  | 266 ± 54    | 0.082 | 0.313 | 0.207 | 0.235 | 0.630 | 0.761 |
| hsa-mir-532 5p  | 71 ± 45   | 196 ± 66   | 241 ± 45    | 0.159 | 0.328 | 0.081 | 0.106 | 0.580 | 0.730 |
| hsa-mir-340 3p  | 68 ± 45   | 177 ± 71   | 343 ± 58    | 0.267 | 0.381 | 0.017 | 0.041 | 0.080 | 0.236 |
| hsa-mir-222 3p  | 68 ± 37   | 295 ± 75   | 634 ± 172   | 0.171 | 0.328 | 0.005 | 0.024 | 0.037 | 0.159 |
| hsa-mir-193b 5p | 67 ± 43   | 96 ± 21    | 164 ± 16    | 0.430 | 0.503 | 0.026 | 0.050 | 0.066 | 0.210 |
| hsa-mir-30a 3p  | 63 ± 45   | 372 ± 146  | 872 ± 319   | 0.310 | 0.418 | 0.022 | 0.046 | 0.090 | 0.251 |
| hsa-mir-1974 5p | 62 ± 48   | 151 ± 39   | 122 ± 31    | 0.141 | 0.314 | 0.338 | 0.359 | 0.601 | 0.743 |
| hsa-mir-887 3p  | 58 ± 43   | 181 ± 60   | 232 ± 21    | 0.115 | 0.313 | 0.044 | 0.071 | 0.467 | 0.637 |
| hsa-mir-455 3p  | 56 ± 24   | 1352 ± 485 | 1770 ± 356  | 0.050 | 0.313 | 0.019 | 0.043 | 0.470 | 0.639 |
| hsa-mir-22 3p   | 56 ± 36   | 1331 ± 522 | 1226 ± 162  | 0.049 | 0.313 | 0.086 | 0.112 | 0.851 | 0.916 |
| hsa-mir-664 3p  | 56 ± 22   | 433 ± 126  | 929 ± 98    | 0.033 | 0.313 | 0.000 | 0.006 | 0.005 | 0.066 |

|                 |         |            |            |       |       |       |       |       |       |
|-----------------|---------|------------|------------|-------|-------|-------|-------|-------|-------|
| hsa-mir-199a 3p | 56 ± 17 | 1484 ± 697 | 2838 ± 515 | 0.122 | 0.313 | 0.010 | 0.031 | 0.117 | 0.287 |
| hsa-mir-130a 3p | 55 ± 42 | 229 ± 84   | 333 ± 80   | 0.149 | 0.319 | 0.040 | 0.067 | 0.350 | 0.544 |
| hsa-mir-29c 5p  | 55 ± 36 | 159 ± 63   | 564 ± 135  | 0.420 | 0.496 | 0.002 | 0.016 | 0.004 | 0.059 |
| hsa-mir-574 3p  | 53 ± 19 | 1035 ± 312 | 1588 ± 441 | 0.062 | 0.313 | 0.010 | 0.032 | 0.240 | 0.438 |
| hsa-mir-148a 3p | 53 ± 31 | 192 ± 105  | 371 ± 27   | 0.262 | 0.381 | 0.026 | 0.051 | 0.131 | 0.302 |
| hsa-mir-146b 5p | 52 ± 42 | 120 ± 42   | 443 ± 250  | 0.736 | 0.751 | 0.087 | 0.112 | 0.103 | 0.270 |
| hsa-mir-181a 5p | 47 ± 38 | 1006 ± 367 | 892 ± 145  | 0.040 | 0.313 | 0.083 | 0.108 | 0.776 | 0.865 |
| hsa-mir-505 3p  | 46 ± 31 | 158 ± 50   | 266 ± 103  | 0.274 | 0.384 | 0.056 | 0.087 | 0.260 | 0.463 |
| hsa-mir-574 5p  | 44 ± 32 | 136 ± 39   | 225 ± 38   | 0.118 | 0.313 | 0.009 | 0.030 | 0.111 | 0.276 |
| hsa-mir-1826 5p | 42 ± 23 | 267 ± 130  | 228 ± 92   | 0.183 | 0.328 | 0.299 | 0.321 | 0.795 | 0.873 |
| hsa-mir-99b 3p  | 41 ± 32 | 102 ± 48   | 183 ± 46   | 0.373 | 0.467 | 0.064 | 0.094 | 0.209 | 0.409 |
| hsa-mir-301a 3p | 39 ± 29 | 79 ± 23    | 168 ± 35   | 0.349 | 0.446 | 0.011 | 0.032 | 0.034 | 0.152 |
| hsa-mir-27b 5p  | 38 ± 33 | 147 ± 47   | 171 ± 34   | 0.099 | 0.313 | 0.065 | 0.094 | 0.687 | 0.807 |
| hsa-mir-886 5p  | 38 ± 34 | 52 ± 19    | 56 ± 20    | 0.684 | 0.705 | 0.628 | 0.639 | 0.904 | 0.955 |
| hsa-mir-590 5p  | 37 ± 26 | 181 ± 82   | 306 ± 84   | 0.222 | 0.351 | 0.043 | 0.070 | 0.253 | 0.456 |
| hsa-mir-421 3p  | 36 ± 27 | 99 ± 31    | 128 ± 29   | 0.175 | 0.328 | 0.073 | 0.099 | 0.498 | 0.662 |
| hsa-mir-210 3p  | 34 ± 24 | 138 ± 43   | 378 ± 97   | 0.264 | 0.381 | 0.003 | 0.019 | 0.013 | 0.096 |
| hsa-mir-192 5p  | 34 ± 16 | 144 ± 54   | 254 ± 48   | 0.140 | 0.314 | 0.012 | 0.033 | 0.119 | 0.287 |
| hsa-mir-182 5p  | 33 ± 16 | 24 ± 10    | 33 ± 9     | 0.599 | 0.633 | 0.992 | 0.992 | 0.567 | 0.721 |
| hsa-mir-125b 3p | 31 ± 20 | 241 ± 81   | 335 ± 33   | 0.043 | 0.313 | 0.009 | 0.030 | 0.298 | 0.491 |
| hsa-mir-10b 5p  | 30 ± 19 | 116 ± 40   | 161 ± 33   | 0.123 | 0.313 | 0.035 | 0.062 | 0.375 | 0.565 |
| hsa-mir-10a 5p  | 29 ± 18 | 52 ± 18    | 83 ± 16    | 0.394 | 0.479 | 0.077 | 0.102 | 0.231 | 0.429 |
| hsa-mir-181b 5p | 29 ± 18 | 281 ± 103  | 115 ± 40   | 0.052 | 0.313 | 0.511 | 0.526 | 0.156 | 0.333 |
| hsa-mir-425 5p  | 29 ± 19 | 142 ± 59   | 269 ± 116  | 0.327 | 0.432 | 0.063 | 0.092 | 0.239 | 0.438 |
| hsa-mir-199b 3p | 28 ± 8  | 742 ± 349  | 1417 ± 258 | 0.122 | 0.313 | 0.010 | 0.031 | 0.118 | 0.287 |
| hsa-mir-15b 5p  | 26 ± 8  | 552 ± 202  | 855 ± 164  | 0.059 | 0.313 | 0.009 | 0.030 | 0.225 | 0.420 |
| hsa-mir-25 3p   | 26 ± 18 | 174 ± 74   | 346 ± 51   | 0.128 | 0.313 | 0.006 | 0.025 | 0.064 | 0.207 |
| hsa-mir-374b 5p | 25 ± 14 | 112 ± 67   | 381 ± 148  | 0.527 | 0.579 | 0.028 | 0.053 | 0.053 | 0.190 |
| hsa-mir-628 5p  | 23 ± 13 | 50 ± 15    | 68 ± 12    | 0.225 | 0.353 | 0.068 | 0.095 | 0.377 | 0.565 |
| hsa-mir-132 3p  | 23 ± 12 | 141 ± 66   | 430 ± 119  | 0.330 | 0.435 | 0.006 | 0.026 | 0.020 | 0.119 |

|                   |         |            |            |       |       |       |       |       |       |
|-------------------|---------|------------|------------|-------|-------|-------|-------|-------|-------|
| hsa-mir-320b 3p   | 23 ± 20 | 280 ± 87   | 220 ± 47   | 0.026 | 0.313 | 0.096 | 0.121 | 0.541 | 0.700 |
| hsa-mir-574 3p    | 22 ± 18 | 57 ± 13    | 105 ± 18   | 0.153 | 0.321 | 0.005 | 0.024 | 0.042 | 0.171 |
| hsa-mir-331 3p    | 22 ± 8  | 1998 ± 644 | 4086 ± 743 | 0.048 | 0.313 | 0.001 | 0.013 | 0.028 | 0.141 |
| hsa-mir-133a 5p   | 22 ± 10 | 91 ± 33    | 227 ± 47   | 0.199 | 0.336 | 0.002 | 0.016 | 0.013 | 0.096 |
| hsa-mir-320a 3p   | 22 ± 11 | 211 ± 61   | 244 ± 82   | 0.060 | 0.313 | 0.042 | 0.070 | 0.715 | 0.825 |
| hsa-mir-34a 5p    | 21 ± 19 | 407 ± 172  | 409 ± 167  | 0.116 | 0.313 | 0.138 | 0.166 | 0.993 | 0.997 |
| hsa-mir-486-as 5p | 21 ± 17 | 174 ± 54   | 349 ± 42   | 0.042 | 0.313 | 0.001 | 0.008 | 0.016 | 0.110 |
| hsa-mir-486 5p    | 21 ± 17 | 174 ± 54   | 349 ± 42   | 0.042 | 0.313 | 0.001 | 0.008 | 0.016 | 0.110 |
| hsa-mir-210 5p    | 20 ± 9  | 81 ± 25    | 129 ± 22   | 0.089 | 0.313 | 0.009 | 0.029 | 0.142 | 0.312 |
| hsa-mir-874 5p    | 20 ± 12 | 115 ± 43   | 241 ± 48   | 0.137 | 0.313 | 0.004 | 0.023 | 0.043 | 0.173 |
| hsa-mir-28 3p     | 20 ± 8  | 75 ± 25    | 129 ± 21   | 0.121 | 0.313 | 0.009 | 0.029 | 0.103 | 0.270 |
| hsa-mir-195 5p    | 20 ± 13 | 156 ± 50   | 235 ± 30   | 0.043 | 0.313 | 0.005 | 0.025 | 0.186 | 0.381 |
| hsa-mir-409 3p    | 18 ± 10 | 207 ± 86   | 292 ± 134  | 0.199 | 0.336 | 0.089 | 0.113 | 0.523 | 0.692 |
| hsa-mir-320c 3p   | 18 ± 17 | 79 ± 21    | 109 ± 21   | 0.067 | 0.313 | 0.014 | 0.036 | 0.294 | 0.491 |
| hsa-mir-92b 3p    | 18 ± 8  | 138 ± 24   | 478 ± 109  | 0.193 | 0.334 | 0.000 | 0.007 | 0.001 | 0.024 |
| hsa-mir-224 5p    | 18 ± 11 | 317 ± 99   | 424 ± 131  | 0.064 | 0.313 | 0.023 | 0.047 | 0.453 | 0.629 |
| hsa-mir-345 5p    | 17 ± 14 | 105 ± 32   | 191 ± 36   | 0.075 | 0.313 | 0.003 | 0.020 | 0.064 | 0.207 |
| hsa-mir-151 5p    | 17 ± 7  | 185 ± 69   | 186 ± 53   | 0.073 | 0.313 | 0.089 | 0.113 | 0.986 | 0.997 |
| hsa-mir-574 5p    | 17 ± 12 | 32 ± 11    | 40 ± 7     | 0.340 | 0.442 | 0.184 | 0.214 | 0.595 | 0.742 |
| hsa-mir-494 3p    | 16 ± 9  | 135 ± 51   | 213 ± 62   | 0.131 | 0.313 | 0.027 | 0.052 | 0.281 | 0.479 |
| hsa-mir-151 3p    | 16 ± 8  | 148 ± 50   | 156 ± 40   | 0.056 | 0.313 | 0.058 | 0.088 | 0.895 | 0.952 |
| hsa-mir-629 3p    | 16 ± 6  | 10 ± 7     | 7 ± 3      | 0.585 | 0.624 | 0.388 | 0.409 | 0.679 | 0.801 |
| hsa-mir-1307 3p   | 15 ± 14 | 54 ± 21    | 106 ± 46   | 0.381 | 0.469 | 0.068 | 0.095 | 0.215 | 0.414 |
| hsa-mir-19a 3p    | 15 ± 11 | 33 ± 9     | 162 ± 36   | 0.555 | 0.605 | 0.000 | 0.008 | 0.000 | 0.023 |
| hsa-mir-151 5p    | 15 ± 9  | 70 ± 24    | 109 ± 24   | 0.112 | 0.313 | 0.018 | 0.042 | 0.222 | 0.419 |
| hsa-mir-486 3p    | 14 ± 4  | 173 ± 66   | 148 ± 28   | 0.055 | 0.313 | 0.122 | 0.149 | 0.728 | 0.829 |
| hsa-mir-1287 5p   | 14 ± 10 | 43 ± 13    | 48 ± 4     | 0.103 | 0.313 | 0.072 | 0.099 | 0.724 | 0.828 |
| hsa-mir-499 5p    | 14 ± 10 | 190 ± 99   | 1086 ± 386 | 0.585 | 0.624 | 0.007 | 0.026 | 0.009 | 0.082 |
| hsa-mir-501 5p    | 14 ± 11 | 49 ± 16    | 86 ± 22    | 0.185 | 0.328 | 0.019 | 0.043 | 0.141 | 0.312 |
| hsa-mir-362 5p    | 13 ± 11 | 31 ± 11    | 83 ± 24    | 0.453 | 0.524 | 0.014 | 0.036 | 0.030 | 0.141 |

|                   |        |          |           |       |       |       |       |       |       |
|-------------------|--------|----------|-----------|-------|-------|-------|-------|-------|-------|
| hsa-mir-1978 3p   | 12 ± 5 | 56 ± 18  | 123 ± 28  | 0.161 | 0.328 | 0.004 | 0.021 | 0.030 | 0.141 |
| hsa-mir-423 5p    | 12 ± 7 | 67 ± 18  | 173 ± 22  | 0.063 | 0.313 | 0.000 | 0.005 | 0.001 | 0.024 |
| hsa-mir-1226 3p   | 12 ± 8 | 27 ± 5   | 68 ± 10   | 0.195 | 0.334 | 0.000 | 0.007 | 0.001 | 0.026 |
| hsa-mir-744 5p    | 12 ± 4 | 118 ± 51 | 330 ± 62  | 0.172 | 0.328 | 0.001 | 0.013 | 0.008 | 0.080 |
| hsa-mir-146a 5p   | 11 ± 7 | 61 ± 20  | 115 ± 19  | 0.085 | 0.313 | 0.003 | 0.019 | 0.048 | 0.184 |
| hsa-let-7b 3p     | 11 ± 3 | 77 ± 16  | 200 ± 22  | 0.019 | 0.313 | 0.000 | 0.001 | 0.000 | 0.009 |
| hsa-mir-483 3p    | 11 ± 4 | 146 ± 48 | 613 ± 191 | 0.400 | 0.484 | 0.003 | 0.019 | 0.006 | 0.066 |
| hsa-mir-1306 5p   | 11 ± 4 | 73 ± 16  | 134 ± 54  | 0.184 | 0.328 | 0.023 | 0.046 | 0.171 | 0.357 |
| hsa-mir-302d 3p   | 11 ± 7 | 25 ± 12  | 33 ± 6    | 0.343 | 0.444 | 0.178 | 0.208 | 0.575 | 0.729 |
| hsa-mir-95 3p     | 11 ± 7 | 78 ± 27  | 97 ± 15   | 0.052 | 0.313 | 0.024 | 0.049 | 0.539 | 0.700 |
| hsa-mir-128 3p    | 10 ± 4 | 156 ± 42 | 372 ± 37  | 0.018 | 0.313 | 0.000 | 0.002 | 0.001 | 0.024 |
| hsa-mir-221 3p    | 10 ± 3 | 102 ± 56 | 122 ± 59  | 0.251 | 0.373 | 0.197 | 0.227 | 0.792 | 0.872 |
| hsa-mir-320d 3p   | 10 ± 8 | 159 ± 54 | 211 ± 48  | 0.051 | 0.313 | 0.018 | 0.042 | 0.443 | 0.618 |
| hsa-mir-7 3p      | 10 ± 3 | 145 ± 53 | 283 ± 74  | 0.121 | 0.313 | 0.008 | 0.028 | 0.092 | 0.251 |
| hsa-mir-16 5p     | 10 ± 6 | 54 ± 25  | 63 ± 4    | 0.139 | 0.314 | 0.100 | 0.125 | 0.737 | 0.832 |
| hsa-mir-486-as 3p | 9 ± 4  | 104 ± 39 | 98 ± 17   | 0.054 | 0.313 | 0.088 | 0.113 | 0.880 | 0.938 |
| hsa-mir-135a 5p   | 9 ± 4  | 25 ± 9   | 65 ± 11   | 0.243 | 0.369 | 0.001 | 0.014 | 0.006 | 0.066 |
| hsa-mir-20a 5p    | 9 ± 7  | 31 ± 11  | 113 ± 26  | 0.379 | 0.469 | 0.001 | 0.013 | 0.003 | 0.049 |
| hsa-mir-98 5p     | 8 ± 6  | 88 ± 29  | 87 ± 13   | 0.035 | 0.313 | 0.048 | 0.076 | 0.980 | 0.997 |
| hsa-mir-93 3p     | 8 ± 6  | 69 ± 26  | 118 ± 17  | 0.076 | 0.313 | 0.007 | 0.026 | 0.127 | 0.297 |
| hsa-mir-181a 3p   | 8 ± 6  | 119 ± 31 | 294 ± 73  | 0.112 | 0.313 | 0.001 | 0.013 | 0.012 | 0.096 |
| hsa-let-7f 3p     | 8 ± 3  | 29 ± 5   | 90 ± 12   | 0.085 | 0.313 | 0.000 | 0.001 | 0.000 | 0.006 |
| hsa-mir-99a 3p    | 8 ± 5  | 15 ± 9   | 38 ± 12   | 0.612 | 0.639 | 0.066 | 0.094 | 0.106 | 0.270 |
| hsa-mir-338-as 5p | 8 ± 7  | 6 ± 2    | 14 ± 6    | 0.861 | 0.869 | 0.429 | 0.447 | 0.280 | 0.479 |
| hsa-mir-208a 5p   | 7 ± 4  | 141 ± 57 | 292 ± 61  | 0.110 | 0.313 | 0.005 | 0.024 | 0.059 | 0.206 |
| hsa-mir-140 5p    | 7 ± 3  | 92 ± 36  | 129 ± 31  | 0.094 | 0.313 | 0.029 | 0.054 | 0.405 | 0.596 |
| hsa-mir-425 3p    | 7 ± 4  | 69 ± 23  | 97 ± 26   | 0.077 | 0.313 | 0.021 | 0.045 | 0.364 | 0.556 |
| hsa-mir-766 3p    | 7 ± 3  | 36 ± 6   | 82 ± 17   | 0.073 | 0.313 | 0.000 | 0.007 | 0.005 | 0.066 |
| hsa-mir-342 5p    | 7 ± 6  | 28 ± 8   | 40 ± 3    | 0.066 | 0.313 | 0.013 | 0.035 | 0.276 | 0.479 |
| hsa-let-7a 3p     | 7 ± 3  | 38 ± 13  | 121 ± 20  | 0.149 | 0.319 | 0.000 | 0.006 | 0.001 | 0.024 |



|                 |       |          |          |       |       |       |       |       |       |
|-----------------|-------|----------|----------|-------|-------|-------|-------|-------|-------|
| hsa-mir-664 5p  | 7 ± 4 | 13 ± 3   | 28 ± 3   | 0.285 | 0.394 | 0.005 | 0.024 | 0.020 | 0.119 |
| hsa-mir-186 5p  | 7 ± 5 | 166 ± 66 | 167 ± 21 | 0.052 | 0.313 | 0.065 | 0.094 | 0.987 | 0.997 |
| hsa-mir-15a 5p  | 6 ± 4 | 48 ± 20  | 78 ± 11  | 0.103 | 0.313 | 0.014 | 0.036 | 0.198 | 0.400 |
| hsa-mir-452 5p  | 6 ± 5 | 59 ± 21  | 58 ± 7   | 0.045 | 0.313 | 0.060 | 0.089 | 0.989 | 0.997 |
| hsa-mir-338 5p  | 6 ± 4 | 18 ± 6   | 55 ± 21  | 0.497 | 0.556 | 0.021 | 0.045 | 0.041 | 0.169 |
| hsa-mir-663b 3p | 6 ± 3 | 13 ± 5   | 17 ± 3   | 0.321 | 0.427 | 0.153 | 0.179 | 0.537 | 0.700 |
| hsa-mir-652 5p  | 6 ± 4 | 20 ± 8   | 20 ± 5   | 0.195 | 0.334 | 0.224 | 0.249 | 1.000 | 1.000 |
| hsa-mir-497 5p  | 6 ± 1 | 52 ± 16  | 142 ± 41 | 0.222 | 0.351 | 0.004 | 0.021 | 0.020 | 0.119 |
| hsa-mir-20b 5p  | 6 ± 3 | 27 ± 10  | 20 ± 6   | 0.124 | 0.313 | 0.312 | 0.335 | 0.588 | 0.737 |
| hsa-mir-144 5p  | 6 ± 3 | 8 ± 5    | 22 ± 5   | 0.810 | 0.823 | 0.079 | 0.105 | 0.077 | 0.231 |
| hsa-mir-382 5p  | 6 ± 4 | 53 ± 18  | 83 ± 27  | 0.129 | 0.313 | 0.027 | 0.052 | 0.290 | 0.488 |
| hsa-mir-221 5p  | 6 ± 2 | 32 ± 10  | 39 ± 5   | 0.047 | 0.313 | 0.022 | 0.046 | 0.544 | 0.702 |
| hsa-mir-187 3p  | 6 ± 4 | 10 ± 5   | 11 ± 8   | 0.590 | 0.625 | 0.563 | 0.574 | 0.931 | 0.978 |
| hsa-mir-127 3p  | 5 ± 2 | 107 ± 66 | 114 ± 43 | 0.227 | 0.355 | 0.230 | 0.253 | 0.933 | 0.978 |
| hsa-mir-1259 5p | 5 ± 5 | 10 ± 6   | 4 ± 2    | 0.575 | 0.622 | 0.872 | 0.875 | 0.436 | 0.611 |
| hsa-let-7d 3p   | 5 ± 4 | 64 ± 24  | 244 ± 84 | 0.410 | 0.489 | 0.007 | 0.026 | 0.016 | 0.110 |
| hsa-mir-93 5p   | 5 ± 3 | 15 ± 5   | 31 ± 8   | 0.270 | 0.382 | 0.018 | 0.042 | 0.085 | 0.244 |
| hsa-mir-505 5p  | 5 ± 4 | 12 ± 3   | 18 ± 4   | 0.262 | 0.381 | 0.066 | 0.094 | 0.317 | 0.505 |
| hsa-mir-106b 5p | 5 ± 2 | 58 ± 20  | 275 ± 76 | 0.403 | 0.484 | 0.001 | 0.013 | 0.002 | 0.045 |
| hsa-mir-148b 3p | 5 ± 2 | 42 ± 16  | 76 ± 14  | 0.097 | 0.313 | 0.007 | 0.027 | 0.111 | 0.276 |
| hsa-mir-1249 3p | 5 ± 2 | 34 ± 8   | 72 ± 18  | 0.094 | 0.313 | 0.002 | 0.016 | 0.027 | 0.141 |
| hsa-mir-130b 3p | 4 ± 4 | 14 ± 5   | 19 ± 6   | 0.251 | 0.373 | 0.117 | 0.144 | 0.537 | 0.700 |
| hsa-mir-339 5p  | 4 ± 3 | 39 ± 16  | 105 ± 31 | 0.254 | 0.375 | 0.006 | 0.026 | 0.030 | 0.141 |
| hsa-mir-155 5p  | 4 ± 3 | 10 ± 3   | 24 ± 5   | 0.364 | 0.460 | 0.011 | 0.032 | 0.033 | 0.148 |
| hsa-mir-642 5p  | 4 ± 2 | 7 ± 2    | 37 ± 5   | 0.587 | 0.624 | 0.000 | 0.005 | 0.000 | 0.006 |
| hsa-mir-379 5p  | 4 ± 3 | 39 ± 18  | 43 ± 5   | 0.121 | 0.313 | 0.104 | 0.130 | 0.825 | 0.893 |
| hsa-mir-181d 5p | 4 ± 2 | 36 ± 12  | 21 ± 7   | 0.041 | 0.313 | 0.268 | 0.291 | 0.295 | 0.491 |
| hsa-mir-532 3p  | 4 ± 3 | 19 ± 7   | 48 ± 17  | 0.331 | 0.435 | 0.018 | 0.042 | 0.067 | 0.211 |
| hsa-mir-502 3p  | 4 ± 2 | 15 ± 6   | 25 ± 9   | 0.277 | 0.387 | 0.061 | 0.090 | 0.278 | 0.479 |
| hsa-mir-28 5p   | 4 ± 2 | 140 ± 55 | 186 ± 41 | 0.064 | 0.313 | 0.026 | 0.050 | 0.489 | 0.655 |

|                   |       |          |          |       |       |       |       |       |       |
|-------------------|-------|----------|----------|-------|-------|-------|-------|-------|-------|
| hsa-mir-130b 5p   | 4 ± 1 | 43 ± 17  | 105 ± 50 | 0.372 | 0.467 | 0.043 | 0.071 | 0.140 | 0.312 |
| hsa-mir-296 5p    | 4 ± 2 | 75 ± 22  | 197 ± 49 | 0.132 | 0.313 | 0.001 | 0.013 | 0.011 | 0.095 |
| hsa-mir-1271 5p   | 4 ± 2 | 57 ± 22  | 79 ± 15  | 0.067 | 0.313 | 0.022 | 0.046 | 0.416 | 0.600 |
| hsa-mir-1301 3p   | 4 ± 3 | 36 ± 13  | 53 ± 10  | 0.066 | 0.313 | 0.012 | 0.034 | 0.262 | 0.463 |
| hsa-mir-590 3p    | 4 ± 2 | 21 ± 10  | 38 ± 7   | 0.176 | 0.328 | 0.022 | 0.046 | 0.176 | 0.364 |
| hsa-mir-1180 3p   | 4 ± 2 | 19 ± 6   | 45 ± 12  | 0.204 | 0.340 | 0.005 | 0.024 | 0.032 | 0.145 |
| hsa-mir-30b 3p    | 4 ± 2 | 11 ± 4   | 33 ± 5   | 0.273 | 0.384 | 0.001 | 0.013 | 0.005 | 0.064 |
| hsa-mir-487b 3p   | 3 ± 2 | 82 ± 31  | 175 ± 55 | 0.172 | 0.328 | 0.011 | 0.033 | 0.090 | 0.251 |
| hsa-mir-145 3p    | 3 ± 2 | 55 ± 23  | 83 ± 6   | 0.062 | 0.313 | 0.012 | 0.033 | 0.263 | 0.463 |
| hsa-mir-125a 3p   | 3 ± 1 | 29 ± 12  | 44 ± 3   | 0.079 | 0.313 | 0.014 | 0.036 | 0.245 | 0.444 |
| hsa-mir-138 5p    | 3 ± 3 | 25 ± 11  | 21 ± 4   | 0.101 | 0.313 | 0.210 | 0.236 | 0.713 | 0.825 |
| hsa-mir-103 5p    | 3 ± 3 | 21 ± 8   | 28 ± 9   | 0.169 | 0.328 | 0.080 | 0.105 | 0.549 | 0.705 |
| hsa-mir-500 3p    | 3 ± 2 | 12 ± 4   | 21 ± 6   | 0.264 | 0.381 | 0.044 | 0.072 | 0.219 | 0.416 |
| hsa-mir-7 5p      | 3 ± 2 | 6 ± 2    | 12 ± 6   | 0.638 | 0.662 | 0.203 | 0.231 | 0.327 | 0.516 |
| hsa-mir-625-as 3p | 3 ± 1 | 37 ± 11  | 72 ± 21  | 0.127 | 0.313 | 0.008 | 0.028 | 0.093 | 0.251 |
| hsa-mir-625 3p    | 3 ± 1 | 37 ± 11  | 72 ± 21  | 0.127 | 0.313 | 0.008 | 0.028 | 0.093 | 0.251 |
| hsa-mir-101 3p    | 3 ± 1 | 129 ± 78 | 213 ± 41 | 0.192 | 0.334 | 0.052 | 0.081 | 0.347 | 0.542 |
| hsa-mir-302b 3p   | 3 ± 3 | 14 ± 6   | 14 ± 3   | 0.174 | 0.328 | 0.209 | 0.236 | 0.980 | 0.997 |
| hsa-mir-224 3p    | 3 ± 1 | 46 ± 16  | 77 ± 13  | 0.055 | 0.313 | 0.005 | 0.024 | 0.132 | 0.302 |
| hsa-mir-495 3p    | 3 ± 1 | 35 ± 12  | 76 ± 30  | 0.242 | 0.369 | 0.022 | 0.046 | 0.120 | 0.288 |
| hsa-mir-940 3p    | 3 ± 2 | 25 ± 7   | 61 ± 13  | 0.103 | 0.313 | 0.001 | 0.011 | 0.009 | 0.083 |
| hsa-mir-598 3p    | 3 ± 1 | 23 ± 12  | 27 ± 9   | 0.182 | 0.328 | 0.143 | 0.170 | 0.788 | 0.871 |
| hsa-mir-493 5p    | 3 ± 1 | 7 ± 2    | 23 ± 6   | 0.539 | 0.589 | 0.008 | 0.028 | 0.013 | 0.096 |
| hsa-mir-181c 3p   | 3 ± 1 | 24 ± 13  | 17 ± 2   | 0.169 | 0.328 | 0.380 | 0.401 | 0.616 | 0.755 |
| hsa-mir-491 5p    | 3 ± 2 | 18 ± 7   | 14 ± 2   | 0.107 | 0.313 | 0.225 | 0.249 | 0.704 | 0.820 |
| hsa-mir-1247 5p   | 3 ± 2 | 16 ± 5   | 87 ± 44  | 0.690 | 0.709 | 0.037 | 0.064 | 0.045 | 0.175 |
| hsa-mir-584 5p    | 3 ± 1 | 14 ± 5   | 52 ± 9   | 0.235 | 0.364 | 0.000 | 0.006 | 0.001 | 0.024 |
| hsa-mir-338 3p    | 3 ± 2 | 12 ± 6   | 53 ± 10  | 0.348 | 0.446 | 0.000 | 0.007 | 0.001 | 0.024 |
| hsa-mir-362 3p    | 3 ± 2 | 10 ± 4   | 34 ± 11  | 0.452 | 0.524 | 0.012 | 0.034 | 0.027 | 0.141 |
| hsa-mir-500 5p    | 3 ± 2 | 8 ± 2    | 22 ± 7   | 0.402 | 0.484 | 0.016 | 0.041 | 0.044 | 0.174 |



|                 |       |         |          |       |       |       |       |       |       |
|-----------------|-------|---------|----------|-------|-------|-------|-------|-------|-------|
| hsa-mir-550 3p  | 3 ± 2 | 37 ± 17 | 47 ± 13  | 0.137 | 0.313 | 0.076 | 0.102 | 0.615 | 0.755 |
| hsa-mir-616 5p  | 2 ± 2 | 16 ± 7  | 19 ± 5   | 0.185 | 0.328 | 0.137 | 0.165 | 0.756 | 0.845 |
| hsa-mir-26b 3p  | 2 ± 2 | 28 ± 15 | 44 ± 8   | 0.160 | 0.328 | 0.045 | 0.073 | 0.367 | 0.557 |
| hsa-mir-181c 5p | 2 ± 1 | 24 ± 9  | 29 ± 5   | 0.074 | 0.313 | 0.046 | 0.074 | 0.666 | 0.788 |
| hsa-mir-30c 3p  | 2 ± 1 | 20 ± 7  | 23 ± 5   | 0.081 | 0.313 | 0.058 | 0.087 | 0.731 | 0.829 |
| hsa-mir-323 3p  | 2 ± 1 | 17 ± 7  | 21 ± 7   | 0.154 | 0.321 | 0.092 | 0.116 | 0.652 | 0.777 |
| hsa-mir-106a 5p | 2 ± 1 | 15 ± 4  | 27 ± 9   | 0.171 | 0.328 | 0.025 | 0.049 | 0.200 | 0.400 |
| hsa-mir-139 3p  | 2 ± 2 | 5 ± 3   | 18 ± 8   | 0.699 | 0.715 | 0.077 | 0.102 | 0.099 | 0.266 |
| hsa-mir-760 3p  | 2 ± 1 | 4 ± 2   | 17 ± 3   | 0.648 | 0.671 | 0.007 | 0.027 | 0.008 | 0.077 |
| hsa-mir-326 3p  | 2 ± 1 | 42 ± 22 | 152 ± 43 | 0.349 | 0.446 | 0.005 | 0.024 | 0.013 | 0.096 |
| hsa-mir-330 3p  | 2 ± 1 | 14 ± 5  | 37 ± 14  | 0.364 | 0.460 | 0.021 | 0.045 | 0.068 | 0.212 |
| hsa-mir-550 5p  | 2 ± 1 | 12 ± 4  | 12 ± 5   | 0.152 | 0.321 | 0.199 | 0.229 | 0.937 | 0.979 |
| hsa-mir-708 5p  | 2 ± 1 | 26 ± 9  | 24 ± 7   | 0.065 | 0.313 | 0.110 | 0.137 | 0.853 | 0.916 |
| hsa-mir-16 3p   | 2 ± 2 | 23 ± 12 | 24 ± 8   | 0.177 | 0.328 | 0.186 | 0.215 | 0.943 | 0.979 |
| hsa-mir-17 3p   | 2 ± 1 | 23 ± 9  | 21 ± 6   | 0.094 | 0.313 | 0.139 | 0.167 | 0.905 | 0.955 |
| hsa-mir-374a 5p | 2 ± 2 | 11 ± 6  | 33 ± 11  | 0.416 | 0.493 | 0.020 | 0.045 | 0.054 | 0.192 |
| hsa-mir-432 5p  | 2 ± 1 | 5 ± 2   | 10 ± 3   | 0.523 | 0.576 | 0.142 | 0.169 | 0.297 | 0.491 |
| hsa-mir-31 5p   | 2 ± 1 | 13 ± 6  | 89 ± 68  | 0.829 | 0.840 | 0.143 | 0.170 | 0.146 | 0.315 |
| hsa-mir-29a 5p  | 2 ± 1 | 10 ± 5  | 9 ± 3    | 0.241 | 0.369 | 0.298 | 0.321 | 0.942 | 0.979 |
| hsa-mir-337 5p  | 2 ± 1 | 8 ± 5   | 18 ± 7   | 0.459 | 0.527 | 0.089 | 0.113 | 0.221 | 0.419 |
| hsa-mir-483 5p  | 2 ± 1 | 7 ± 1   | 20 ± 4   | 0.269 | 0.382 | 0.002 | 0.015 | 0.006 | 0.066 |
| hsa-mir-542 3p  | 2 ± 1 | 36 ± 18 | 63 ± 19  | 0.185 | 0.328 | 0.037 | 0.064 | 0.266 | 0.466 |
| hsa-mir-337 3p  | 2 ± 1 | 30 ± 12 | 68 ± 22  | 0.203 | 0.340 | 0.012 | 0.033 | 0.078 | 0.231 |
| hsa-mir-132 5p  | 2 ± 1 | 29 ± 16 | 49 ± 13  | 0.200 | 0.336 | 0.046 | 0.074 | 0.303 | 0.496 |
| hsa-mir-671 3p  | 2 ± 1 | 23 ± 7  | 41 ± 6   | 0.049 | 0.313 | 0.002 | 0.016 | 0.064 | 0.207 |
| hsa-mir-212 3p  | 2 ± 1 | 20 ± 9  | 74 ± 26  | 0.424 | 0.497 | 0.011 | 0.032 | 0.026 | 0.141 |
| hsa-mir-15b 3p  | 2 ± 2 | 17 ± 7  | 15 ± 5   | 0.112 | 0.313 | 0.201 | 0.230 | 0.782 | 0.868 |
| hsa-mir-129 3p  | 2 ± 1 | 13 ± 4  | 16 ± 3   | 0.048 | 0.313 | 0.029 | 0.054 | 0.654 | 0.777 |
| hsa-mir-218 3p  | 2 ± 0 | 9 ± 3   | 32 ± 8   | 0.377 | 0.468 | 0.003 | 0.019 | 0.007 | 0.066 |
| hsa-mir-1227 3p | 2 ± 1 | 7 ± 2   | 13 ± 4   | 0.266 | 0.381 | 0.036 | 0.063 | 0.177 | 0.364 |

|                 |       |         |         |       |       |       |       |       |       |
|-----------------|-------|---------|---------|-------|-------|-------|-------|-------|-------|
| hsa-mir-652 3p  | 2 ± 2 | 1 ± 1   | 30 ± 17 | 0.996 | 0.996 | 0.068 | 0.095 | 0.040 | 0.166 |
| hsa-mir-874 3p  | 1 ± 1 | 40 ± 15 | 24 ± 9  | 0.057 | 0.313 | 0.268 | 0.291 | 0.384 | 0.570 |
| hsa-mir-424 5p  | 1 ± 1 | 36 ± 16 | 36 ± 8  | 0.090 | 0.313 | 0.113 | 0.139 | 0.991 | 0.997 |
| hsa-mir-671 5p  | 1 ± 1 | 29 ± 10 | 12 ± 3  | 0.028 | 0.313 | 0.393 | 0.412 | 0.127 | 0.297 |
| hsa-mir-675 3p  | 1 ± 1 | 23 ± 10 | 37 ± 11 | 0.148 | 0.319 | 0.035 | 0.062 | 0.317 | 0.505 |
| hsa-mir-214 5p  | 1 ± 1 | 15 ± 7  | 20 ± 4  | 0.122 | 0.313 | 0.068 | 0.095 | 0.623 | 0.760 |
| hsa-mir-455 5p  | 1 ± 1 | 14 ± 5  | 16 ± 4  | 0.105 | 0.313 | 0.073 | 0.100 | 0.720 | 0.826 |
| hsa-mir-23b 5p  | 1 ± 1 | 12 ± 3  | 34 ± 12 | 0.300 | 0.405 | 0.009 | 0.030 | 0.035 | 0.153 |
| hsa-mir-935 3p  | 1 ± 1 | 11 ± 5  | 33 ± 9  | 0.286 | 0.394 | 0.007 | 0.026 | 0.027 | 0.141 |
| hsa-mir-550 3p  | 1 ± 1 | 18 ± 8  | 23 ± 7  | 0.147 | 0.319 | 0.083 | 0.108 | 0.625 | 0.760 |
| hsa-mir-424 3p  | 1 ± 1 | 25 ± 15 | 10 ± 6  | 0.182 | 0.328 | 0.641 | 0.650 | 0.353 | 0.545 |
| hsa-mir-744 3p  | 1 ± 1 | 22 ± 9  | 38 ± 6  | 0.079 | 0.313 | 0.008 | 0.028 | 0.145 | 0.315 |
| hsa-mir-92a 5p  | 1 ± 1 | 12 ± 3  | 4 ± 1   | 0.028 | 0.313 | 0.505 | 0.522 | 0.088 | 0.250 |
| hsa-mir-188 5p  | 1 ± 1 | 17 ± 8  | 15 ± 5  | 0.131 | 0.313 | 0.219 | 0.246 | 0.810 | 0.880 |
| hsa-mir-504 5p  | 1 ± 1 | 16 ± 5  | 40 ± 9  | 0.144 | 0.319 | 0.002 | 0.016 | 0.020 | 0.119 |
| hsa-mir-490 3p  | 1 ± 1 | 14 ± 7  | 9 ± 5   | 0.169 | 0.328 | 0.418 | 0.437 | 0.560 | 0.716 |
| hsa-mir-99b 5p  | 1 ± 1 | 12 ± 5  | 18 ± 4  | 0.118 | 0.313 | 0.028 | 0.052 | 0.316 | 0.505 |
| hsa-mir-376c 3p | 1 ± 0 | 21 ± 8  | 25 ± 6  | 0.088 | 0.313 | 0.061 | 0.090 | 0.716 | 0.825 |
| hsa-mir-363 3p  | 1 ± 0 | 11 ± 4  | 23 ± 7  | 0.211 | 0.345 | 0.016 | 0.041 | 0.106 | 0.270 |
| hsa-let-7c 3p   | 1 ± 1 | 9 ± 3   | 22 ± 5  | 0.163 | 0.328 | 0.003 | 0.021 | 0.028 | 0.141 |
| hsa-mir-130a 5p | 1 ± 1 | 8 ± 4   | 14 ± 3  | 0.247 | 0.373 | 0.062 | 0.091 | 0.318 | 0.505 |
| hsa-mir-107 5p  | 1 ± 1 | 8 ± 3   | 14 ± 3  | 0.219 | 0.351 | 0.038 | 0.065 | 0.232 | 0.429 |
| hsa-mir-1228 3p | 1 ± 1 | 8 ± 3   | 34 ± 10 | 0.462 | 0.528 | 0.004 | 0.021 | 0.007 | 0.066 |
| rno-mir-320 3p  | 1 ± 1 | 7 ± 3   | 13 ± 2  | 0.251 | 0.373 | 0.040 | 0.067 | 0.210 | 0.409 |
| hsa-mir-101 5p  | 1 ± 1 | 7 ± 5   | 12 ± 7  | 0.490 | 0.552 | 0.223 | 0.249 | 0.494 | 0.660 |
| hsa-mir-208b 5p | 1 ± 1 | 5 ± 3   | 24 ± 8  | 0.580 | 0.623 | 0.013 | 0.035 | 0.018 | 0.118 |
| hsa-mir-106b 3p | 1 ± 1 | 5 ± 3   | 12 ± 4  | 0.457 | 0.527 | 0.057 | 0.087 | 0.142 | 0.312 |
| hsa-mir-2110 5p | 1 ± 0 | 66 ± 26 | 66 ± 28 | 0.091 | 0.313 | 0.113 | 0.139 | 0.993 | 0.997 |
| hsa-mir-329 3p  | 1 ± 0 | 30 ± 13 | 48 ± 23 | 0.221 | 0.351 | 0.077 | 0.102 | 0.425 | 0.604 |
| hsa-mir-382 3p  | 1 ± 0 | 13 ± 5  | 33 ± 13 | 0.318 | 0.425 | 0.021 | 0.045 | 0.082 | 0.238 |

|                 |       |         |         |       |       |       |       |       |       |
|-----------------|-------|---------|---------|-------|-------|-------|-------|-------|-------|
| hsa-mir-1248 5p | 1 ± 0 | 10 ± 4  | 14 ± 8  | 0.260 | 0.381 | 0.150 | 0.177 | 0.632 | 0.761 |
| hsa-mir-769 5p  | 1 ± 1 | 8 ± 4   | 43 ± 12 | 0.511 | 0.568 | 0.002 | 0.016 | 0.003 | 0.050 |
| hsa-mir-369 5p  | 1 ± 0 | 7 ± 3   | 12 ± 4  | 0.299 | 0.405 | 0.076 | 0.102 | 0.313 | 0.505 |
| hsa-mir-23a 5p  | 1 ± 0 | 6 ± 3   | 26 ± 11 | 0.578 | 0.623 | 0.025 | 0.050 | 0.040 | 0.166 |
| hsa-mir-190 3p  | 1 ± 0 | 6 ± 2   | 16 ± 3  | 0.285 | 0.394 | 0.006 | 0.025 | 0.022 | 0.130 |
| hsa-mir-154 5p  | 1 ± 0 | 5 ± 3   | 19 ± 6  | 0.520 | 0.575 | 0.016 | 0.041 | 0.030 | 0.141 |
| hsa-mir-142 5p  | 1 ± 0 | 28 ± 13 | 49 ± 11 | 0.123 | 0.313 | 0.017 | 0.041 | 0.200 | 0.400 |
| hsa-let-7e 3p   | 1 ± 0 | 17 ± 5  | 35 ± 10 | 0.127 | 0.313 | 0.006 | 0.026 | 0.073 | 0.224 |
| hsa-mir-24 5p   | 1 ± 0 | 12 ± 3  | 17 ± 3  | 0.029 | 0.313 | 0.008 | 0.028 | 0.354 | 0.545 |
| hsa-mir-409 5p  | 1 ± 0 | 5 ± 2   | 12 ± 4  | 0.407 | 0.487 | 0.058 | 0.087 | 0.167 | 0.351 |
| hsa-mir-18a 5p  | 1 ± 1 | 2 ± 1   | 29 ± 17 | 0.909 | 0.915 | 0.067 | 0.095 | 0.050 | 0.184 |
